# Supplementary material for: Testing the Resilience, Physiological Plasticity and Mechanisms Underlying Upper Temperature Limits of Antarctic Marine Ectotherms
Source: MDPI journal article supplement (doi:10.3390/biology13040224), 2024-03-29
Supplement: s1 [file s1]

# Testing the resilience, physiological plasticity and mechanisms underlying upper temperature limits of Antarctic marine ectotherms

Simon A. Morley<sup>1</sup>, Amanda E. Bates<sup>2</sup>, Melody S. Clark<sup>1</sup>, Elaine Fitzcharles<sup>1</sup>, Rebecca Smith<sup>1</sup>, Rose E. Stainthorp<sup>1,3</sup>, Lloyd S. Peck<sup>1</sup>

## Supplementary Materials

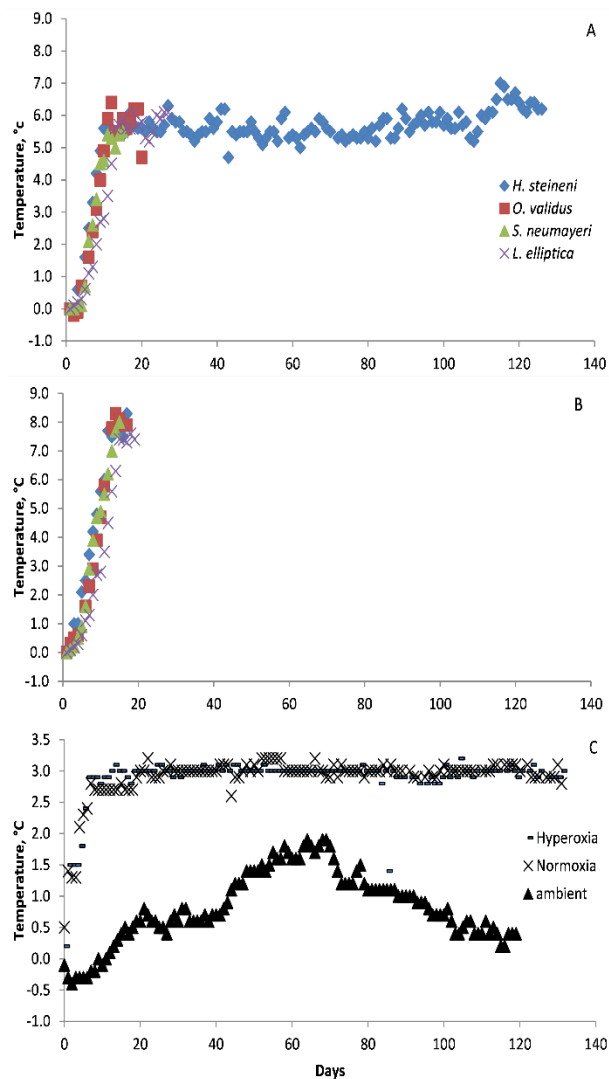

Figure S1. Example temperatures during ramping and incubation experiments at, A 6.0 °C and B 8.0 °C for 4 species *Heterocucumis steineni*, *Odontaster validus*, *Sterechnus neumayeri* and *Laternula elliptica*, C for the 1<sup>st</sup> temperature-oxygen experiment.

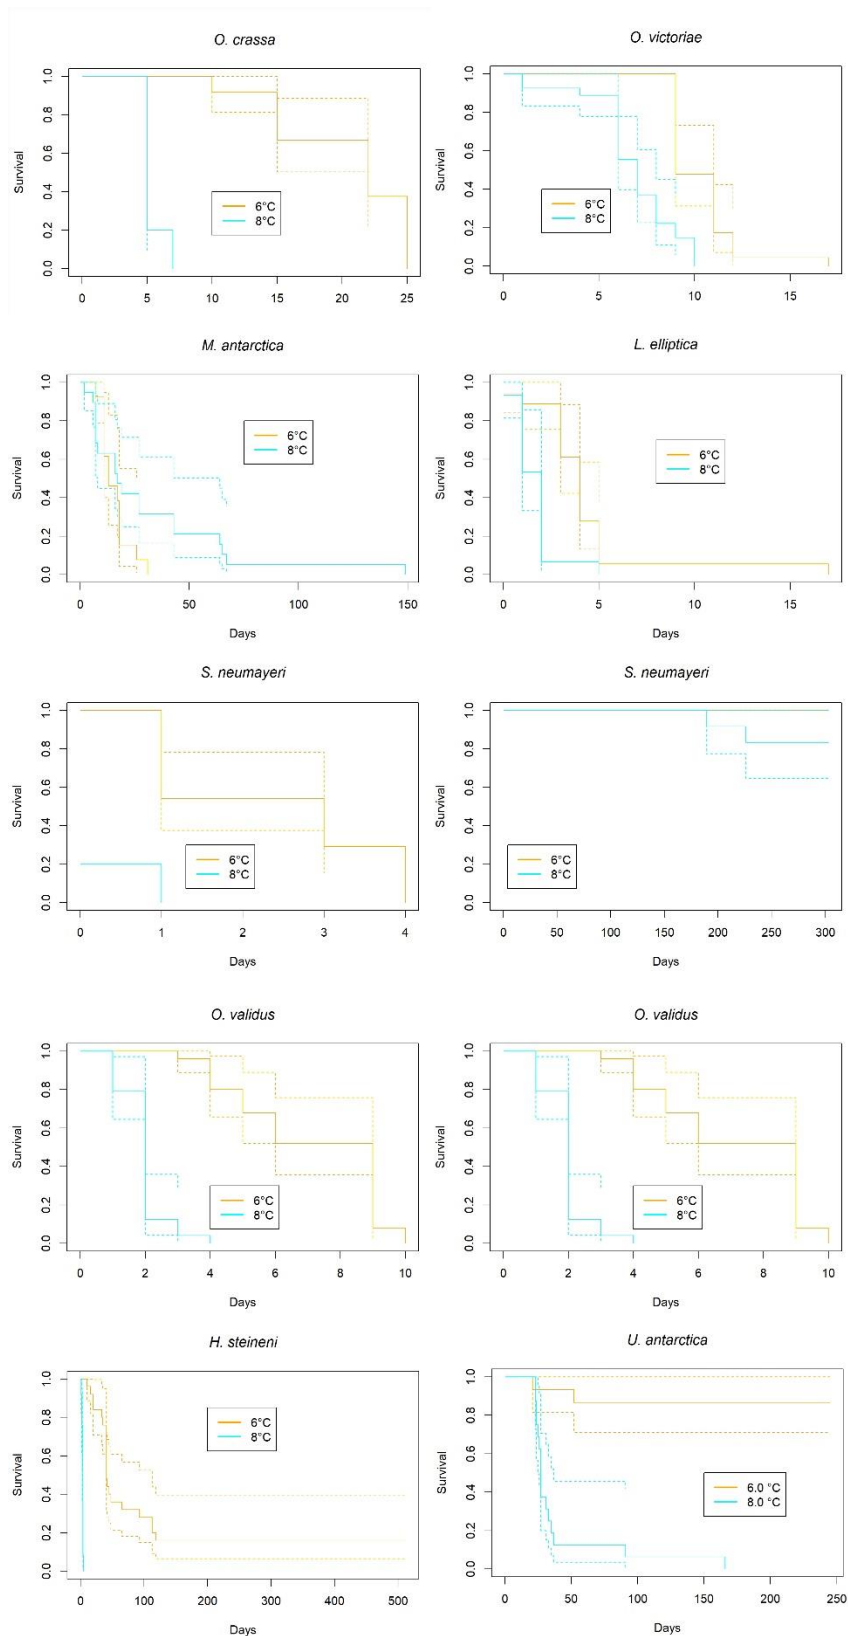

Fig S2. Kaplan Meier fits for survival of *Ophiura crassa*, *Opinionotus victoriae*, *Margarella antarctica*, *Laternula elliptica*, *Sterechnius neumayeri*, *Odontaster Validus*, *Heterocucumis steineni* and *Urticinopsis antarctica*.

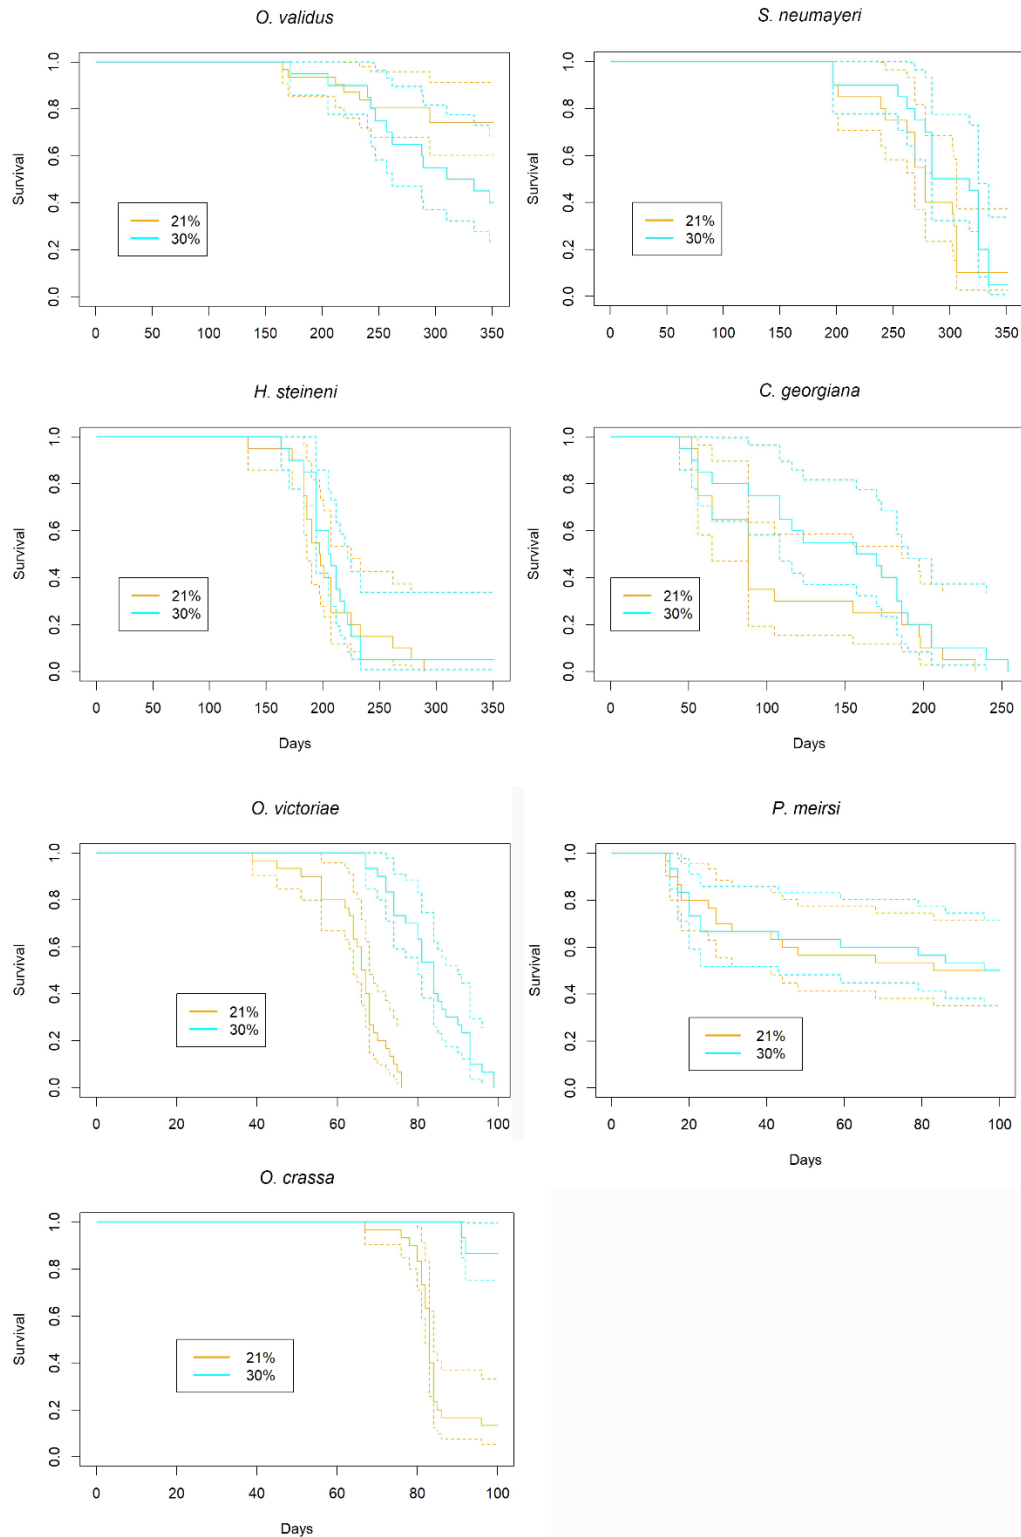

Fig S3. Kaplan-meier fits for survival of *Odontaster validus*, *Sterechinus neumayeri*, *Heterocucumis steineni*, *Cucumaria georgiana*, *Ophionotus victoriae*, *Paraceradocus miersi* and *Ophiura crassa* incubated at normoxia (21%) and hyperoxia (30%). See table 1 and Fig. 1 for incubation temperatures.

Table S1. Median and interquartile range from Kaplan Meier fits in days ( $\pm$  Inter-Quartile Range). Nominal temperatures of 6.0 and 8.0 °C are listed that had a typical SE of  $\pm$  0.04 °C (Fig. 1).

| Species              | Temp/ °C | Median | IQR    | Mantel-Haenszel<br>Chi <sup>2</sup> | P     |
|----------------------|----------|--------|--------|-------------------------------------|-------|
| <i>O. crassa</i>     | 6.0      | 22     | 22-na  |                                     |       |
|                      | 8.0      | 5      | 5-5    | 41.4                                | <0.01 |
| <i>O. victoriae</i>  | 6.0      | 9      | 9-11   |                                     |       |
|                      | 8.0      | 7      | 6-8    | 47.8                                | <0.01 |
| <i>M. antarctica</i> | 6.0      | 13     | 11-na  |                                     |       |
|                      | 8.0      | 17     | 8-64   | 2.4                                 | 0.1   |
| <i>L. elliptica</i>  | 6.0      | 4      | 3-5    |                                     |       |
|                      | 8.0      | 2      | 1-2    | 13.4                                | <0.01 |
| <i>S. neumayeri</i>  | 6.0      | na     | na     |                                     |       |
|                      | 8.0      | na     | Na     | 3.7                                 | 0.06  |
| <i>O. validus</i>    | 6.0      | na     | na     | -                                   | -     |
| <i>H. steineni</i>   | 6.0      | 41     | 41-113 |                                     |       |
|                      | 8.0      | 4      | 3-4    | 52.1                                | <0.01 |
| <i>U. antarctica</i> | 6.0      | na     | Na     |                                     |       |
|                      | 8.0      | 27     | 25-37  | 25.6                                | <0.01 |

Table S2. Wet mass of incubated individuals, mean, standard error and sample size. Within each species, there were no significant differences in wet mass between treatments.

| Species                        | accl Temp | tank | replicate | Mean | Sem  | N  |
|--------------------------------|-----------|------|-----------|------|------|----|
| <i>Urticinopsis antarctica</i> | 0         | 1    |           | 12.2 | 0.33 | 10 |
|                                | 0         | 2    |           | 11.2 | 0.91 | 9  |
|                                | 6         | 1    |           | 12.5 | 0.35 | 7  |
|                                | 6         | 2    |           | 13.0 | 0.34 | 6  |
| <i>Heterocucumis steineni</i>  | 0         | 1    | 1         | 13.9 | 6.8  | 11 |
|                                | 0         | 2    | 1         | 12.9 | 3.4  | 11 |
|                                | 0         | 3    | 1         | 22.1 | 2.6  | 10 |
|                                | 0         | 3    | 2         | 33.5 | 4.6  | 8  |
|                                | 6         | 1    | 1         | 0.6  | 0.2  | 4  |
|                                | 6         | 2    | 1         | 22.7 | 2.3  | 10 |
|                                | 6         | 2    | 2         | 24.3 | 5.4  | 10 |
|                                | 6         | 3    | 1         | 27.1 | 4.4  | 10 |
|                                | 6         | 3    | 2         | 17.8 | 2.6  | 10 |
| <i>Odontaster validus</i>      | 0         | 1    | 1         | 14.4 | 1.8  | 7  |
|                                | 0         | 1    | 2         | 12.1 | 2.7  | 4  |
|                                | 0         | 2    | 1         | 24.8 | 1.9  | 3  |
|                                | 6         | 1    | 1         | 7.9  | 0.9  | 10 |
|                                | 6         | 2    | 1         | 11.3 | 1.5  | 9  |
| <i>Sterechinus neumayeri</i>   | 0         | 1    |           | 19.6 | 6.0  | 8  |
|                                | 0         | 2    |           | 21.6 | 3.4  | 8  |
|                                | 0         | 3    |           | 12.6 | 3.1  | 5  |
|                                | 6         | 1    |           | 25.8 | 2.0  | 9  |
|                                | 6         | 2    |           | 23.4 | 3.0  | 12 |
|                                | 8         | 1    |           | 19.6 | 3.2  | 10 |

Table S3. Median and interquartile range from Kaplan Meier fits for *Odontaster Validus*, *Sterechinus neumayeri*, *Heterocucumis steineni*, *Cucumaria georgiana*, *Ophionotus victoriae*, *Paraceradocus meirsi* and *Ophiura crassa* incubated at either normoxia (21%) and hyperoxia (30%).

| Species             | Temp       | Oxygen | Median | IQR     | Mantel-Haenszel ChiSq | P    |
|---------------------|------------|--------|--------|---------|-----------------------|------|
| <i>O. validus</i>   | 8.0 (10.0) | 21     | na     | na      |                       |      |
|                     | 8.0 (10.0) | 30     | 322    | 262-na  | 9.3                   | 0.01 |
| <i>S. neumayeri</i> | 8.0 (10.0) | 21     | 278    | 269-na  |                       |      |
|                     | 8.0 (10.0) | 30     | 300    | 284-na  | 1.9                   | 0.2  |
| <i>H. steineni</i>  | 8.0 (10.0) | 21     | 198    | 186-225 |                       |      |

|                     |            |    |      |         |      |       |
|---------------------|------------|----|------|---------|------|-------|
|                     | 8.0 (10.0) | 30 | 206  | 194-222 | 0.2  | 0.6   |
| <i>C. georgiana</i> | 8.0        | 21 | 88   | 65-186  |      |       |
|                     | 8.0 (10.0) | 30 | 164  | 108-190 | 1.8  | 0.2   |
| <i>O. victoriae</i> | 3.0        | 21 | 66.5 | 64-68   |      |       |
|                     | 3.0        | 30 | 84   | 80-90   | 47.8 | <0.01 |
| <i>P. meirsi</i>    | 3.0        | 21 | 83   | 41-na   |      |       |
|                     | 3.0        | 30 | 96   | 43-na   | 0    | 1     |
| <i>O. crassa</i>    | 3.0        | 21 | 82   | 82-na   |      |       |
|                     | 3.0        | 30 | na   | na      | 41.4 | <0.01 |
